# Supplementary material for: Large-scale computational and statistical analyses of high transcription potentialities in 32 prokaryotic genomes
Source: PubMed Central journal article supplement — Nucleic Acids Res. 2008 Apr 25;36(10):3332–40. doi: 10.1093/nar/gkn135 (PMC2425493; doi:10.1093/nar/gkn135), 2008-04-25
Supplement: gkn135_1.pdf [file gkn135_1.pdf]

# Appendix 1.

## Combinations of -35 and -10 consensus used to scan the 32 prokaryotic genomes

| <i>n</i>                                 | <i>a</i>   | -35 consensus | -10 consensus |
|------------------------------------------|------------|---------------|---------------|
| <i>Aquifex aeolicus</i> vf5              | Others_AA  | TTTAA         | TAAAAAT       |
| <i>Bacillus subtilis</i> 168             | Firm_BS    | TTGAA         | TATAAT        |
| <i>Borrelia burgdorferi</i> b31          | Spiro_BB   | TTTAA         | TATAAT        |
| <i>Brucella melitensis</i> 16m chr1      | Proteo_BM  | TTGAA         | TATAAT        |
| <i>Chlamydomphila pneumoniae</i> ar 39   | Chla_CPn   | TTTAA         | TATAAT        |
| <i>Clostridium perfringens</i> str13     | Firm_CPe   | TTTAA         | TATAAT        |
| <i>Deinococcus radiodurans</i> r1 chr1   | Others_DR  | TTGAC         | TAAAAAT       |
| <i>Escherichia coli</i> k12              | Proteo_EC  | TTGAC         | TATAAT        |
| <i>Haemophilus influenza</i> rd kw20     | Proteo_HI  | TTGAA         | TAAAAAT       |
| <i>Helicobacter pylori</i> j99           | Proteo_HP  | TTTAA         | TAAAAAT       |
| <i>Listeria innocua</i>                  | Firm_LI    | TTGAA         | TATAAT        |
| <i>Listeria monocytogenes</i> strain EGD | Firm_LM    | TTGAA         | TATAAT        |
| <i>Mycobacterium leprae</i> tn           | Atb_ML     | TTGAC         | TAAAAAT       |
| <i>Mycobacterium tuberculosis</i> h37rv  | Atb_MT     | TTGAC         | TAAAAAT       |
| <i>Mycoplasma genitalium</i> G37         | Molli_MGe  | TTGAA         | TAAAAAT       |
| <i>Mycoplasma pneumoniae</i> M129        | Molli_MPn  | TTTAA         | TAAAAAT       |
| <i>Neisseria meningitidis</i> mc58       | Proteo_NM  | TTGAA         | TAAAAAT       |
| <i>Oceanobacillus ihayensis</i> hte831   | Firm_OI    | TTGAA         | TATAAT        |
| <i>Pseudomonas aeruginosa</i> pa01       | Proteo_PAe | TTGAA         | TATAAT        |
| <i>Rickettsia prowazekii</i> madrid e    | Proteo_RPM | TTTAA         | TATAAT        |
| <i>Salmonella typhimurium</i> lt2        | Proteo_ST  | TTGAA         | TATAAT        |
| <i>Shewanella oneidensis</i> mr1         | Proteo_SO  | TTGAA         | TAAAAAT       |
| <i>Sinorhizobium meliloti</i> 1021       | Proteo_SM  | TTGAA         | TATAAT        |
| <i>Staphylococcus aureus</i> mw2         | Firm_SA    | TTTAA         | TATAAT        |
| <i>Streptococcus pneumoniae</i> r6       | Firm_SPn   | TTGAA         | TATAAT        |
| <i>Streptomyces coelicolor</i> a3 (2)    | Atb_SC     | TTGAC         | TAAAAAT       |
| <i>Thermoanaerobacter tengcongensis</i>  | Firm_TT    | TTGAA         | TATAAT        |
| <i>Thermotoga maritima</i>               | Others_TM  | TTGAA         | TATAAT        |
| <i>Treponema pallidum</i> nichols        | Spiro_TPN  | TTGAC         | TATAAT        |
| <i>Vibrio cholerae</i> n16961 chr1       | Proteo_VC  | TTGAA         | TAAAAAT       |
| <i>Xanthomonas campestris</i> atcc 33913 | Proteo_XC  | TTGAA         | TATAAT        |
| <i>Yersinia pestis</i>                   | Proteo_YP  | TTGAA         | TATAAT        |

**Table 1.1** Combinations of -35 and -10 consensus used to analyse the 32 prokaryotic genomes. *n*: micro-organism name; *a*: abbreviation for micro-organism name (Atb: *Actinobacteria*, Chla: *Chlamydia*, Firm: *Firmicutes* (among which Molli.: *Mollicutes*), "Others" group, Proteo: *Proteobacteria*, Spiro: *Spirochaetales*).

| <i>n</i>                                 | <i>a</i>   | <i>at</i> | <i>g</i>    | <i>CI</i>                |                            | <i>CII</i>                |                             | $p1_{CI} \times p2_{CI}$<br>(%) | $p1_{CII} \times p2_{CII}$<br>(%) |
|------------------------------------------|------------|-----------|-------------|--------------------------|----------------------------|---------------------------|-----------------------------|---------------------------------|-----------------------------------|
|                                          |            |           |             | <i>upsp<sub>CI</sub></i> | <i>p2<sub>CI</sub></i> (%) | <i>upsp<sub>CII</sub></i> | <i>p2<sub>CII</sub></i> (%) |                                 |                                   |
| <i>Aquifex aeolicus vf5</i>              | Others_AA  | 57.62     | <b>1522</b> | <b>19</b>                | 8.9                        | <b>73</b>                 | 21.9                        | 1.3                             | 4.8                               |
| <i>Bacillus subtilis 168</i>             | Firm_BS    | 59.27     | <b>3979</b> | <b>115</b>               | 14.5                       | <b>416</b>                | 34.0                        | 2.9                             | 10.5                              |
| <i>Borrelia burgdorferi b31</i>          | Spiro_BB   | 73.07     | <b>850</b>  | <b>25</b>                | 58.1                       | <b>40</b>                 | 81.6                        | 2.9                             | 4.7                               |
| <i>Brucella melitensis 16m</i>           | Proteo_BM  | 45.56     | <b>2059</b> | <b>0</b>                 | 0                          | <b>4</b>                  | 4.3                         | 0                               | 0.2                               |
| <i>Chlamydomphila pneumoniae ar 39</i>   | Chla_CPn   | 62.55     | <b>1069</b> | <b>6</b>                 | 26.1                       | <b>14</b>                 | 46.7                        | 0.6                             | 1.3                               |
| <i>Clostridium perfringens str13</i>     | Firm_CPe   | 74.93     | <b>2532</b> | <b>511</b>               | 64.1                       | <b>730</b>                | 87.4                        | 20.2                            | 28.8                              |
| <i>Deinococcus radiodurans r1</i>        | Others_DR  | 34.01     | <b>2521</b> | <b>0</b>                 | 0                          | <b>1</b>                  | 0.5                         | 0                               | 0.0                               |
| <i>Escherichia coli k12</i>              | Proteo_EC  | 52.34     | <b>4173</b> | <b>3</b>                 | 3.1                        | <b>22</b>                 | 8.7                         | 0.1                             | 0.5                               |
| <i>Haemophilus influenzae rd ku20</i>    | Proteo_HI  | 64.22     | <b>1673</b> | <b>8</b>                 | 25.8                       | <b>20</b>                 | 54.1                        | 0.5                             | 1.2                               |
| <i>Helicobacter pylori j99</i>           | Proteo_HP  | 62.95     | <b>1478</b> | <b>7</b>                 | 22.6                       | <b>17</b>                 | 50.0                        | 0.5                             | 1.2                               |
| <i>Listeria innocua</i>                  | Firm_LI    | 64.25     | <b>2962</b> | <b>145</b>               | 20.3                       | <b>501</b>                | 53.0                        | 4.9                             | 16.9                              |
| <i>Listeria monocytogenes strain EGD</i> | Firm_LM    | 63.97     | <b>2837</b> | <b>147</b>               | 20.8                       | <b>488</b>                | 52.7                        | 5.2                             | 17.2                              |
| <i>Mycobacterium leprae tn</i>           | Atb_ML     | 49.55     | <b>2670</b> | <b>0</b>                 | 0                          | <b>1</b>                  | 0.8                         | 0                               | 0.0                               |
| <i>Mycobacterium tuberculosis h37rv</i>  | Atb_MT     | 35.47     | <b>3909</b> | <b>0</b>                 | 0                          | <b>2</b>                  | 0.7                         | 0                               | 0.1                               |
| <i>Mycoplasma genitalium G37</i>         | Molli_MGe  | 69.54     | <b>441</b>  | <b>1</b>                 | 25.0                       | <b>1</b>                  | 25.0                        | 0.2                             | 0.2                               |
| <i>Mycoplasma pneumoniae M129</i>        | Molli_MPn  | 61.74     | <b>644</b>  | <b>2</b>                 | 11.1                       | <b>10</b>                 | 38.5                        | 0.3                             | 1.6                               |
| <i>Neisseria meningitidis mc58</i>       | Proteo_NM  | 51.90     | <b>1954</b> | <b>3</b>                 | 6.0                        | <b>13</b>                 | 14.1                        | 0.2                             | 0.7                               |
| <i>Oceanobacillus ihyensis hte831</i>    | Firm_OI    | 66.41     | <b>3398</b> | <b>217</b>               | 24.6                       | <b>576</b>                | 54.9                        | 6.4                             | 17.0                              |
| <i>Pseudomonas aeruginosa pa01</i>       | Proteo_PAe | 35.28     | <b>5565</b> | <b>0</b>                 | 0                          | <b>6</b>                  | 1.7                         | 0                               | 0.1                               |
| <i>Rickettsia prowazekii madrid e</i>    | Proteo_RPM | 73.16     | <b>796</b>  | <b>2</b>                 | 33.3                       | <b>6</b>                  | 100                         | 0.3                             | 0.8                               |
| <i>Salmonella typhimurium lt2</i>        | Proteo_ST  | 51.22     | <b>4334</b> | <b>10</b>                | 8.6                        | <b>40</b>                 | 11.7                        | 0.2                             | 0.9                               |
| <i>Shewanella oneidensis mr1</i>         | Proteo_SO  | 56.69     | <b>4501</b> | <b>10</b>                | 8.5                        | <b>38</b>                 | 22.8                        | 0.2                             | 0.8                               |
| <i>Sinorhizobium meliloti 1021</i>       | Proteo_SM  | 39.50     | <b>3272</b> | <b>0</b>                 | 0                          | <b>6</b>                  | 1.6                         | 0                               | 0.2                               |
| <i>Staphylococcus aureus mw2</i>         | Firm_SA    | 69.77     | <b>2610</b> | <b>225</b>               | 40.2                       | <b>431</b>                | 69.3                        | 8.6                             | 16.5                              |
| <i>Streptococcus pneumoniae r6</i>       | Firm_SPn   | 62.39     | <b>1861</b> | <b>59</b>                | 27.7                       | <b>120</b>                | 42.1                        | 3.2                             | 6.5                               |
| <i>Streptomyces coelicolor a3 (2)</i>    | Atb_SC     | 29.15     | <b>4665</b> | <b>0</b>                 | 0                          | <b>0</b>                  | 0                           | 0                               | 0                                 |
| <i>Thermoanaerobacter tengcongensis</i>  | Firm_TT    | 63.83     | <b>2588</b> | <b>150</b>               | 25.8                       | <b>407</b>                | 56.9                        | 5.8                             | 15.7                              |
| <i>Thermotoga maritima</i>               | Others_TM  | 54.59     | <b>1790</b> | <b>31</b>                | 10.2                       | <b>120</b>                | 17.0                        | 1.7                             | 6.7                               |
| <i>Treponema pallidum nichols</i>        | Spiro_TPN  | 47.00     | <b>980</b>  | <b>1</b>                 | 2.4                        | <b>8</b>                  | 6.4                         | 0.1                             | 0.8                               |
| <i>Vibrio cholerae n16961</i>            | Proteo_VC  | 54.80     | <b>2618</b> | <b>2</b>                 | 6.7                        | <b>5</b>                  | 6.9                         | 0.1                             | 0.2                               |
| <i>Xanthomonas campestris atcc 33913</i> | Proteo_XC  | 35.55     | <b>4120</b> | <b>0</b>                 | 0                          | <b>0</b>                  | 0                           | 0                               | 0                                 |
| <i>Yersinia pestis</i>                   | Proteo_YP  | 55.36     | <b>4090</b> | <b>3</b>                 | 5.8                        | <b>20</b>                 | 14.7                        | 0.1                             | 0.5                               |

**Table 2.2** Frequencies of genes with a putative  $\sigma 70$  promoter harbouring an UP element, under two constraint sets, in 32 prokaryotic genomes. *n*: micro-organism name; *a*: abbreviation for micro-organism name (see Table 2.1); *at*: average percentage of nucleotides T and A over the 350 bp-long region upstream of start codon, computed over the total number *g* of genes in the genome; *upsp<sub>CI</sub>*: number of genes with an UP element harboured in the Strong Promoter region, identified under constraint set *CI*; *upsp<sub>CII</sub>*: *idem*, under the more relaxed constraint set *CII* (see text, Section "Genome analysis upon request" for the definition of *CI* and *CII* constraints);  $p2_{CI} = 100 \times upsp_{CI}/sp_{CI}$ ,  $p2_{CII} = 100 \times upsp_{CII}/sp_{CII}$ , with *sp<sub>CI</sub>* (resp. *sp<sub>CII</sub>*) the number of genes harbouring a Strong Promoter under constraints *CI* (resp. *CII*). The percentages indicated in the two rightmost columns are respectively  $p1_{CI} \times p2_{CI} = upsp_{CI}/g$  and  $p1_{CII} \times p2_{CII} = upsp_{CII}/g$ , that is the ratio of the number of genes identified with an UP element in their putative strong promoter, to the number *g* of genes encoding proteins in the genome considered.
