# Supplementary material for: Large-scale computational and statistical analyses of high transcription potentialities in 32 prokaryotic genomes
Source: PubMed Central journal article supplement — Nucleic Acids Res. 2008 Apr 25;36(10):3332–40. doi: 10.1093/nar/gkn135 (PMC2425493; doi:10.1093/nar/gkn135), 2008-04-25
Supplement: gkn135_8.pdf [file gkn135_8.pdf]

## Appendix 6.

### Comparing observations in bacterial genomes with expectations in randomly generated genomes

Magnification of the results obtained for randomly generated genomes

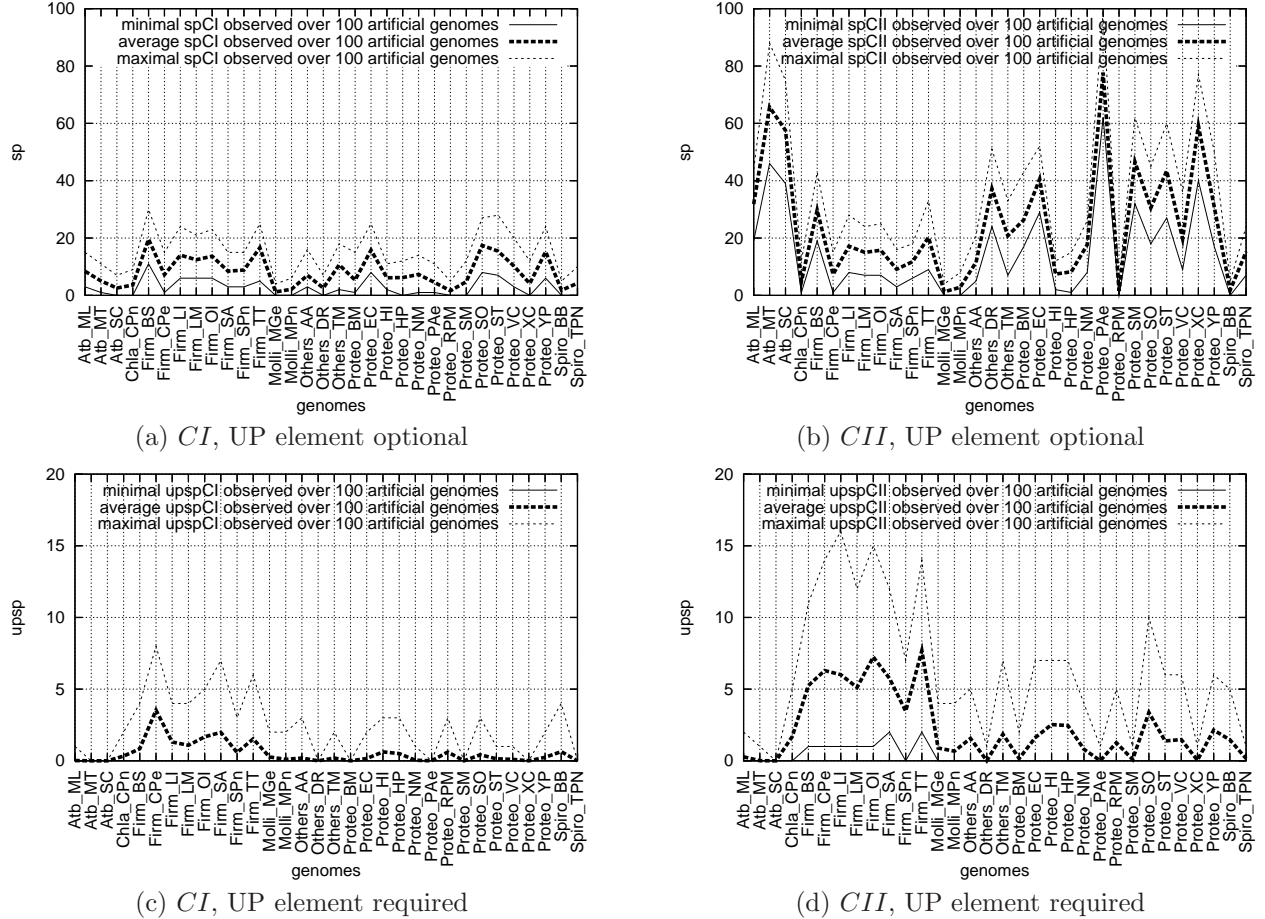

**Figure 6.1** Minimal, average and maximal values observed over 100 randomly generated genomes, for *sp* and *upsp* respectively; 32 bacterial genomes are considered (see Figure 1 for genome nomenclature). For each such bacterial genome, 100 artificial genomes are generated at random, which have same proportions of A, C, T, G nucleotides and same total number of genes encoding proteins as the bacterial genome. *sp<sub>CI</sub>* denotes the number of genes with a putative **Strong Promoter** identified under constraint set *CI*. *sp<sub>CII</sub>* is defined similarly for constraint set *CII* (see Section "Systems and methods", Subsection "Genome analysis upon request" for the definition of *CI* and *CII* constraints). *upsp<sub>CI</sub>* denotes the number of genes with an **UP** element in their putative **Strong Promoter**, and identified under constraint set *CI*. *upsp<sub>CII</sub>* is defined similarly.

### Description of statistical significance through Z-scores

In Section "Are potentially strong  $\sigma 70$  promoter-like sequences harbouring an UP-like element frequent?", *CII* condition has been shown to be under-constrained when not combined with the presence of the UP element. Therefore, in the sequel, the data relative to *CII* are only provided for the record.

Table 6.1 compares the Z-scores obtained under all four conditions. When Z-scores could not be calculated, we noticed that the *sp* value (respectively the *upsp* value) observed for the bacterial genome and the corresponding value expected for the average artificial genome are both equal to 0 (exceptionally, such previous values are equal to 1 and 0 respectively).

|                               | <i>CI</i>           |       |       |      | <i>CII</i>          |       |       |      | <i>CI</i> |       |       |      | <i>CII</i> |       |       |      |
|-------------------------------|---------------------|-------|-------|------|---------------------|-------|-------|------|-----------|-------|-------|------|------------|-------|-------|------|
|                               | UP element optional |       |       |      | UP element required |       |       |      |           |       |       |      |            |       |       |      |
|                               | min                 | max   | av    | std  | min                 | max   | av    | std  | min       | max   | av    | std  | min        | max   | av    | std  |
| 8 <i>Firmicutes</i>           | 81.3                | 308.5 | 193.0 | 66.1 | 92.9                | 324.6 | 216.9 | 66.8 | 74.9      | 291.7 | 155.9 | 64.3 | 69.4       | 311.9 | 188.3 | 66.9 |
| 13 <i>Proteobacteria</i>      | 1.0                 | 32.4  | 16.0  | 9.5  | 3.4                 | 53.6  | 23.5  | 15.2 | 2.0       | 15.6  | 11.0  | 7.9  | 4.4        | 66.6  | 16.8  | 17.0 |
|                               |                     |       |       |      |                     |       |       |      | (1)       |       |       |      |            |       |       |      |
| 26 species with large genomes | 1.0                 | 308.5 | 74.9  | 89.9 | 4.9                 | 324.6 | 91.4  | 97.0 | 0.15      | 291.7 | 76.9  | 81.6 | 0.2        | 311.9 | 75.9  | 88.8 |
|                               |                     |       |       |      |                     |       |       |      | (2)       |       |       |      | (3)        |       |       |      |

**Table 6.1** Evaluation of the statistical significance of  $\sigma 70$  promoter frequencies: comparison between different bacterial groups. For details about Z-scores, see text, Subsection "Comparing observations in bacterial genomes with expectations in randomly generated genomes"; av: average, std: standard deviation. (1)(2)(3): Z-scores were calculable respectively for 10, 19 and 25 genomes.

| genome name                                        | abbreviation | <i>CI</i>           |     |    |     | <i>CII</i>          |    |    |    | <i>CI</i>           |     |     |    | <i>CII</i>          |    |    |  |
|----------------------------------------------------|--------------|---------------------|-----|----|-----|---------------------|----|----|----|---------------------|-----|-----|----|---------------------|----|----|--|
|                                                    |              | UP element optional |     |    |     | UP element required |    |    |    | UP element required |     |     |    | UP element required |    |    |  |
| genomes for which Z-score value is above threshold |              |                     |     |    |     |                     |    |    |    |                     |     |     |    |                     |    |    |  |
|                                                    |              | 7                   | 15  | 80 | 7   | 15                  | 80 | 7  | 15 | 80                  | 7   | 15  | 80 | 7                   | 15 | 80 |  |
| <i>Mycobacterium leprae</i> tn                     | Atb_ML       | ML                  | ML  |    | ML  | ML                  |    |    |    |                     |     |     |    |                     |    |    |  |
| <i>Mycobacterium tuberculosis</i> h37rv            | Atb_MT       | MT                  |     |    | MT  | MT                  |    | -  | -  | -                   | MT  | MT  |    |                     |    |    |  |
| <i>Streptomyces coelicolor</i> a3 (2)              | Atb_SC       | SC                  |     |    | SC  | SC                  |    | -  | -  | -                   | -   | -   | -  |                     |    |    |  |
| <i>Aquifex aeolicus</i> vf5                        | Others_AA    | AA                  | AA  | AA | AA  | AA                  | AA | AA | AA | AA                  | AA  | AA  | AA | AA                  | AA | AA |  |
| <i>Deinococcus radiodurans</i> r1                  | Others_DR    | DR                  |     |    | DR  | DR                  |    | -  | -  | -                   | DR  |     |    |                     |    |    |  |
| <i>Thermotoga maritima</i>                         | Others_TM    | TM                  | TM  | TM | TM  | TM                  | TM | TM | TM | TM                  | TM  | TM  | TM | TM                  | TM | TM |  |
| <i>Brucella melitensis</i> 16m                     | Proteo_BM    | BM                  |     |    | BM  |                     |    | -  | -  | -                   | BM  |     |    |                     |    |    |  |
| <i>Escherichia coli</i> k12                        | Proteo_EC    | EC                  | EC  |    | EC  | EC                  |    | EC |    |                     | EC  | EC  |    |                     |    |    |  |
| <i>Haemophilus influenza</i> rd kw20               | Proteo_HI    | HI                  |     |    | HI  |                     |    | HI |    |                     | HI  |     |    |                     |    |    |  |
| <i>Helicobacter pylori</i> j99                     | Proteo_HP    | HP                  |     |    | HP  |                     |    | HP |    |                     | HP  |     |    |                     |    |    |  |
| <i>Neisseria meningitidis</i> mc58                 | Proteo_NM    | NM                  | NM  |    | NM  | NM                  |    | NM | NM |                     | NM  |     |    |                     |    |    |  |
| <i>Pseudomonas aeruginosa</i> pa01                 | Proteo_PAe   | PAe                 | PAe |    | PAe | PAe                 |    | -  | -  | -                   | PAe | PAe |    |                     |    |    |  |
| <i>Sinorhizobium meliloti</i> 1021                 | Proteo_SM    | SM                  | SM  |    | SM  | SM                  |    | -  | -  | -                   | SM  | SM  |    |                     |    |    |  |
| <i>Shewanella oneidensis</i> mr1                   | Proteo_SO    | SO                  | SO  |    | SO  | SO                  |    | SO |    |                     | SO  | SO  |    |                     |    |    |  |
| <i>Salmonella typhimurium</i> lt2                  | Proteo_ST    | ST                  | ST  |    | ST  | ST                  |    | ST | ST |                     | ST  | ST  |    |                     |    |    |  |
| <i>Vibrio cholerae</i> n16961                      | Proteo_VC    |                     |     |    | VC  |                     |    |    |    |                     |     |     |    |                     |    |    |  |
| <i>Xanthomonas campestris</i> atcc 33913           | Proteo_XC    |                     |     |    |     |                     |    | -  | -  | -                   |     |     |    |                     |    |    |  |
| <i>Yersinia pestis</i>                             | Proteo_YP    | YP                  |     |    | YP  | YP                  |    |    |    |                     | YP  |     |    |                     |    |    |  |

**Table 6.2** Evaluation of the statistical significance of  $\sigma 70$  promoter frequencies for 18 bacterial species selected as non *Firmicutes* species with large genomes. For definition of *CI* and *CII* constraints, see Section "Systems and methods", Subsection "Genome analysis upon request". Three significance thresholds are considered (7, 15 and 80). – means that the Z-score is not calculable. In a given column, the mention of a species points out statistical significance for the corresponding threshold.

|            |          | Z-scores       |      |       |         |                    |  |
|------------|----------|----------------|------|-------|---------|--------------------|--|
|            |          | <i>E. coli</i> | min  | max   | average | standard deviation |  |
| <i>CI</i>  | optional | <b>21.7</b>    | 1.0  | 308.5 | 74.9    | 89.9               |  |
| <i>CII</i> | "        | <b>38.2</b>    | 4.9  | 324.6 | 91.4    | 97.0               |  |
| <i>CI</i>  | required | <b>7.3</b>     | 0.15 | 291.7 | 76.9    | 81.6               |  |
| <i>CII</i> | "        | <b>15.3</b>    | 0.2  | 311.9 | 75.9    | 88.8               |  |

**Table 6.3** Evaluation of the statistical significance of  $\sigma 70$  promoter frequencies: comparison of *E. coli* with respect to 26 species with large genomes.

|                     |          | Z-score threshold |    |    | number of genomes with calculable Z-scores |
|---------------------|----------|-------------------|----|----|--------------------------------------------|
|                     |          | 7                 | 15 | 80 |                                            |
| UP element presence |          |                   |    |    |                                            |
| <i>CI</i>           | optional | 24                | 15 | 10 | 26                                         |
| <i>CII</i>          | "        | 25                | 21 | 10 | 26                                         |
| <i>CI</i>           | required | 16                | 12 | 7  | 19                                         |
| <i>CII</i>          | "        | 22                | 16 | 8  | 25                                         |

**Table 6.4** Numbers of large genomes (among 26) for which the total number of putative strong promoters identified is shown to be significantly different from that of the corresponding "average" randomly generated genome.

## Description of statistical significance through relative differences

In complement to Figure 2, Table 6.5 describes the relative differences between bacterial and randomly generated genomes. With an overwhelming majority, this relative difference is always higher than 0.70. However, we would insist that an asserted difference must not be mistaken for biological significance, whose proof can only be brought through experimental validation. Besides, we recall that results relative to *CII* constraint are only provided for the record.

|                                       | UP element optional |            | UP element required |            |
|---------------------------------------|---------------------|------------|---------------------|------------|
|                                       | <i>CI</i>           | <i>CII</i> | <i>CI</i>           | <i>CII</i> |
| Aquifex aeolicus v3                   | 0.97                | 0.97       | 0.99                | 0.95       |
| Bacillus subtilis 168                 | 0.98                | 0.98       | 0.99                | 0.95       |
| Borrelia burgdorferi b31              | 0.96                | 0.96       | 0.97                | 0.99       |
| Brucella melitensis 16m chr1          | 0.79                | 0.72       |                     | 0.95       |
| Chlamydomonas reinhardtii ac39        | 0.84                | 0.84       | 0.95                | 0.97       |
| Clostridium perfringens str13         | 0.99                | 0.99       | 0.99                | 1.00       |
| Deinococcus radiodurans r1 chr1       | 0.88                | 0.82       |                     | 0.98       |
| Escherichia coli k12                  | 0.84                | 0.84       | 0.95                | 0.85       |
| Haemophilus influenzae rd kw20        | 0.80                | 0.80       | 0.92                | 0.95       |
| Helicobacter pylori j99               | 0.80                | 0.76       | 0.93                | 0.87       |
| Listeria innocua                      | 0.98                | 0.98       | 0.99                | 0.99       |
| Listeria monocytogenes strain EGD     | 0.98                | 0.98       | 0.99                | 0.99       |
| Mycobacterium leprae ta               | 0.74                | 0.74       |                     |            |
| Mycobacterium tuberculosis h37rv      | 0.84                | 0.77       |                     | 0.99       |
| Mycoplasma genitalium G37             | 0.70                | 0.68       | 0.73                | 0.85       |
| Mycoplasma pneumoniae M129            | 0.88                | 0.89       | 0.95                | 0.90       |
| Neisseria meningitidis mc58           | 0.85                | 0.81       | 0.99                | 0.92       |
| Oceanobacillus thersites hteS31       | 0.99                | 0.99       | 0.99                | 0.98       |
| Pseudomonas aeruginosa pa01           | 0.99                | 0.78       |                     | 1.00       |
| Rickettsia prowazekii madrid c        | 0.74                | 0.73       | 0.70                | 0.97       |
| Salmonella typhimurium lt2            | 0.87                | 0.87       | 0.99                | 0.97       |
| Shewanella oneidensis mr1             | 0.85                | 0.82       | 0.96                | 0.88       |
| Sinorhizobium meliloti 1021           | 0.91                | 0.88       |                     | 0.94       |
| Staphylococcus aureus mw2             | 0.99                | 0.99       | 0.99                | 0.99       |
| Streptococcus pneumoniae rg           | 0.96                | 0.96       | 0.99                | 0.98       |
| Streptomyces coelicolor a3 (2)        | 0.88                | 0.83       |                     |            |
| Thermoanaerobacter tengcongensis      | 0.97                | 0.97       | 0.99                | 0.97       |
| Thermotoga maritima                   | 0.97                | 0.97       | 0.99                | 0.99       |
| Treponema pallidum nichols            | 0.99                | 0.88       | 1.00                | 0.97       |
| Vibrio cholerae n16961 chr1           | 0.66                | 0.73       | 0.95                | 0.82       |
| Xanthomonas campestris atcc 33913     | 0.31                | 0.39       |                     |            |
| Yersinia pestis kim                   | 0.74                | 0.77       | 0.92                | 0.89       |
| average (global)                      | 0.86                | 0.85       | 0.95                | 0.95       |
| average (large genomes)               | 0.86                | 0.85       | 0.94                | 0.95       |
| average (large non Firmicute genomes) | 0.81                | 0.79       | 0.96                | 0.93       |
| average (large Firmicute genomes)     | 0.96                | 0.96       | 0.99                | 0.98       |

Table 6.5 Another description of the difference between bacterial and randomly generated genomes: the ratio displayed is computed as  $\frac{f_{bact} - f_{rand}}{f_{bact}}$ , where  $f_{bact}$  and  $f_{rand}$  respectively denote the frequency of genes encoding proteins harbouring a putative strong promoter, in a bacterial genome, and the corresponding frequency in the similarly-AT rich genome generated at random.

## Is there a genome size bias? Comparison of *Firmicutes* genomes with similarly AT-rich *Proteobacteria* genomes

Hereafter, we complete our analysis, checking that the specificity observed for *Firmicutes* is not due to genome size bias. For this purpose, we compare two *Proteobacteria* genomes (*H. influenza*, *H. pylori*) and four *Firmicutes* genomes (*L. innocua*, *L. monocytogenes*, *S. pneumoniae*, *T. tengcongensis*). All six (high) AT-richeresses range in the narrow interval [60.8%, 62.6%]. Successively considering the number of promoters observed in each *Proteobacteria* genome as a reference, we calculate a corrected frequency for each *Firmicute* genome, applying a correction based on proportionality relative to genome sizes. Then we compare observed values *versus* corrected values under each of the four conditions studied. Not only do we implement such corrections for bacterial genomes, we also process the six average random genomes in a similar way (see Tables 6.5 and 6.6). When considering the average genomes generated at random corresponding to *Firmicutes*, we show that the order of magnitude is identical for expected values and corrected expected values. In contrast, when dealing with bacterial genomes, the size bias correction does not smooth out the difference between *Firmicutes* and *Proteobacteria*.

| <i>Proteobacteria</i>     |             |             | <i>Firmicutes</i> |                 |             |                |             |                |             |                |
|---------------------------|-------------|-------------|-------------------|-----------------|-------------|----------------|-------------|----------------|-------------|----------------|
|                           | HI          | HP          | LI                |                 | LM          |                | SPn         |                | TT          |                |
| AT-content                | 61.9%       | 60.8%       | 62.6%             |                 | 62.0%       |                | 60.28%      |                | 62.4%       |                |
| g                         | <b>1673</b> | <b>1478</b> | <b>2962</b>       | <i>HI - HP</i>  | <b>2837</b> | <i>HI - HP</i> | <b>1861</b> | <i>HI - HP</i> | <b>2588</b> | <i>HI - HP</i> |
|                           | obs         | obs         | obs               | corr            | obs         | corr           | obs         | corr           | obs         | corr           |
| <i>sp<sub>CI</sub></i>    | 31          | 31          | 713               | <i>54-62(*)</i> | 707         | <i>52-59</i>   | 213         | <i>34-39</i>   | 581         | <i>47-54</i>   |
| <i>sp<sub>CII</sub></i>   | 37          | 34          | 946               | <i>65-68</i>    | 926         | <i>62-65</i>   | 285         | <i>41-42</i>   | 715         | <i>57-59</i>   |
| <i>upsp<sub>CI</sub></i>  | 8           | 7           | 145               | <i>14-14</i>    | 147         | <i>13-13</i>   | 59          | <i>8-8</i>     | 150         | <i>12-12</i>   |
| <i>upsp<sub>CII</sub></i> | 20          | 17          | 501               | <i>35-34</i>    | 488         | <i>33-32</i>   | 120         | <i>22-21</i>   | 407         | <i>30-29</i>   |

**Table 6.6** Comparison of the observed numbers of putative strong promoters between two *Proteobacteria* and four *Firmicutes* genomes characterized by close (high) AT-contents (range [60.2%, 62.4%]), under conditions *CI* and *CII*, and with or without UP element required. *g*: total number of genes encoding proteins in the genome considered; HI: *Haemophilus influenza*, HP: *Helicobacter pylori*; LI: *Listeria innocua*, LM: *Listeria monocytogenes*, SPn: *Streptococcus pneumoniae*, TT: *Thermoanaerobacter tengcongensis*; obs: observed values, corr: corrected values. (\*) With HI then HP taken as a reference, these columns in italics yield the corrected values *sp<sub>CI</sub>*, ..., *upsp<sub>CII</sub>* on the basis of proportionality to total gene number; the two corrected values in italics have to be compared with the value on their left. Example: the reference being HI, corrected *sp<sub>CI,corr</sub>* for LI is  $sp_{CI,corr}(LI) = \frac{sp_{CI,obs}(HI) \times 2962}{1673} = 54$ , with  $sp_{CI,obs}(HI) = 31$ ;  $sp_{CI,corr}(LI)$  has to be compared with the value of 713 observed for LI.

| <i>Proteobacteria</i>     |             |             | <i>Firmicutes</i> |                 |             |                |             |                |             |                |
|---------------------------|-------------|-------------|-------------------|-----------------|-------------|----------------|-------------|----------------|-------------|----------------|
|                           | HI          | HP          | LI                |                 | LM          |                | SPn         |                | TT          |                |
| AT-content                | 61.9%       | 60.8%       | 62.6%             |                 | 62.0%       |                | 60.28%      |                | 62.4%       |                |
| g                         | <b>1673</b> | <b>1478</b> | <b>2962</b>       | <i>HI - HP</i>  | <b>2837</b> | <i>HI - HP</i> | <b>1861</b> | <i>HI - HP</i> | <b>2588</b> | <i>HI - HP</i> |
|                           | exp         | exp         | exp               | corr            | exp         | corr           | exp         | corr           | exp         | corr           |
| <i>sp<sub>CI</sub></i>    | 6           | 6           | 14                | <i>10-12(*)</i> | 12          | <i>10-11</i>   | 8           | <i>6-7</i>     | 16          | <i>9-10</i>    |
| <i>sp<sub>CII</sub></i>   | 7           | 8           | 17                | <i>12-16</i>    | 14          | <i>11-15</i>   | 11          | <i>7-10</i>    | 20          | <i>10-12</i>   |
| <i>upsp<sub>CI</sub></i>  | 0           | 0           | 1                 | <i>0-0</i>      | 1           | <i>0-0</i>     | 0           | <i>0-0</i>     | 1           | <i>0-0</i>     |
| <i>upsp<sub>CII</sub></i> | 2           | 2           | 6                 | <i>3-4</i>      | 5           | <i>3-3</i>     | 3           | <i>2-2</i>     | 7           | <i>3-3</i>     |

**Table 6.7** Comparison of the expected numbers of putative strong promoters between six average genomes generated at random and characterized by the same AT-contents as two *Proteobacteria* and four *Firmicutes* genomes (range [60.2%, 62.4%]), under conditions *CI* and *CII*, and with or without UP element required. See Table 6.5 caption for explanations. Example: the reference being HI, corrected *sp<sub>CI,corr</sub>* for LI is  $sp_{CI,corr}(LI) = \frac{sp_{CI,exp}(HI) \times 2962}{1673} = 10$ , with  $sp_{CI,exp}(HI) = 6$ ;  $sp_{CI,corr}(LI)$  has to be compared with the value of 14 expected for the average artificial genome having the same AT-richness as the LI genome.
