# Supplementary material for: Large-scale computational and statistical analyses of high transcription potentialities in 32 prokaryotic genomes
Source: PubMed Central journal article supplement — Nucleic Acids Res. 2008 Apr 25;36(10):3332–40. doi: 10.1093/nar/gkn135 (PMC2425493; doi:10.1093/nar/gkn135), 2008-04-25
Supplement: gkn135_9.pdf [file gkn135_9.pdf]

## Appendix 7.

### Supplement to the discussion about the *Firmicutes* case

Due to mismatches and a maximal distance of 200 specified for the gap between SD and -10 box, we could not compute the theoretical expected probabilities to encounter  $\sigma 70$  promoter-like sequences in randomly generated genomes. We were therefore compelled to implement simulations. In the case of the occurrence of an optimal Shine-Dalgarno sequence located between 2 and 10 bp upstream of the start codon, the calculation of the *exact* probability, denoted  $p_{rand}$ , is tractable. In the sequel, we will consider the language  $\mathcal{L}$  of words of length 15 (maximal bp distance added to SD sequence length), constructed on alphabet  $\mathcal{A} = \{A, C, T, G, n\}$ ,  $n$  being the usual IUPAC character indifferently coding for A, C, T or G.  $O_i$  ( $1 \leq i \leq 9$ ) will denote the event of an optimal SD sequence occurring at bp distance  $i + 1$ , upstream of the start codon. Such 9 events simply correspond to the enumeration  $nnnnnnnnnGGAGGnn$ ,  $nnnnnnnnGGAGGnnn$ ,  $\dots$ ,  $nGGAGGnnnnnnnnnn$ ,  $GGAGGnnnnnnnnnn$ . Second,  $O_{i_1} \cap O_{i_2} \dots \cap O_{i_k}$  ( $i_1 < i_2 < \dots < i_k$ ) will represent the event corresponding to  $k$  overlappings. Finally, the probability of a word  $w$  belonging to  $\mathcal{L}$  is denoted  $p(w)$  and is merely computed as the product of its character probabilities (depending on the bacterial genome considered).

To take account of possible overlappings between occurrences, probability  $p_{rand}$  is successively refined following the Poincaré formula:

$$p_{rand}\left(\bigcup_{i=1}^9 O_i\right) = \sum_{i=1}^9 p(O_i) - \sum_{1 \leq i < j \leq 9} p(O_i \cap O_j) + \sum_{1 \leq i < j < k \leq 9} p(O_i \cap O_j \cap O_k) - \dots + (-1)^8 p(O_1 \cap \dots \cap O_9).$$

Namely, at level 1, the approximate probability  $p_{rand}$  amounts to the sum  $S_1$  of the probabilities of all 9 occurrences  $nnnnnnnnnGGAGGnn$ ,  $nnnnnnnnGGAGGnnn$   $\dots$   $nGGAGGnnnnnnnnnn$ ,  $GGAGGnnnnnnnnnn$ . At level 2, the sum  $S_2$  of the probabilities for pairwise intersections  $nnnnnnGGAGGAGGnn$ ,  $nnnnGGAGGGAGGnn$ ,  $\dots$   $GGAGGGAGGnnnnnnn$ ,  $GGAGGAGGnnnnnnn$  is subtracted from  $S_1$ . The process is iterated successively adding to or subtracting from current  $p_{rand}$  decreasing terms.

Finally, given the probability  $p_{rand}$  and the number  $g$  of genes encoding proteins in the genome considered, we calculate the mean and standard deviation for the expected number of genes associated with SD optimal sequences as the parameters of a normal law:  $M_{rand} = p_{rand} \times g$ ,  $\sigma_{rand} = \sqrt{g \times p_{rand} \times (1 - p_{rand})}$ . Then we compute the corresponding Z-score as  $Z\text{-score} = \frac{obs - M_{rand}}{\sigma_{rand}}$ , where  $obs$  is the number of genes associated with optimal SD sequences observed in the bacterial genome considered.

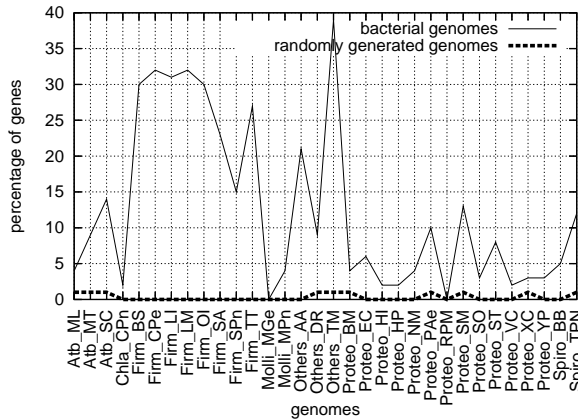

**Figure 7.1** Percentage of genes encoding proteins associated with the optimal Shine-Dalgarno sequence GGAGG - comparison between the ratios observed in 32 bacterial genomes ( $p_{bact}$ ) and the ratios expected from similarly-AT rich genomes generated at random ( $p_{rand}$ );  $p_{rand}$  is expressed as a percentage.

Table 7.1 describes the Z-scores observed over the 32 genomes analysed.

| genome name                              | abbreviation | $p_{bact}$<br>(%) | $p_{rand}$<br>(%) | Z-score       |
|------------------------------------------|--------------|-------------------|-------------------|---------------|
| <i>Mycobacterium leprae tn</i>           | Atb_ML       | 4.87              | 1.08              | 18.95         |
| <i>Mycobacterium tuberculosis h37rv</i>  | Atb_MT       | 9.24              | 1.88              | 35.05         |
| <i>Streptomyces coelicolor a3 (2)</i>    | Atb_SC       | 14.26             | 1.98              | 61.4          |
| <i>Chlamydomonas reinhardtii ar 39</i>   | Chla_CPn     | 2.81              | 0.37              | 13.56         |
| <i>Bacillus subtilis 168</i>             | Firm_BS      | 30.79             | 0.64              | <b>251.25</b> |
| <i>Clostridium perfringens str13</i>     | Firm_CPe     | 32.98             | 0.23              | <b>363.89</b> |
| <i>Listeria innocua</i>                  | Firm_LI      | 31.94             | 0.48              | <b>262.17</b> |
| <i>Listeria monocytogenes strain EGD</i> | Firm_LM      | 32.64             | 0.48              | <b>247.38</b> |
| <i>Oceanobacillus theyensis hte831</i>   | Firm_OI      | 30.87             | 0.40              | <b>304.7</b>  |
| <i>Staphylococcus aureus mw2</i>         | Firm_SA      | 23.83             | 0.27              | <b>235.6</b>  |
| <i>Streptococcus pneumoniae r6</i>       | Firm_SPn     | 15.31             | 0.55              | <b>86.82</b>  |
| <i>Thermoanaerobacter tengcongensis</i>  | Firm_TT      | 27.63             | 0.72              | <b>168.19</b> |
| <i>Mycoplasma genitalium G37</i>         | Molli_MGe    | 0.91              | 0.21              | 3.18          |
| <i>Mycoplasma pneumoniae M129</i>        | Molli_MPn    | 4.04              | 0.37              | 15.96         |
| <i>Aquifex aeolicus vf5</i>              | Others_AA    | 21.88             | 0.64              | 106.20        |
| <i>Deinococcus radiodurans r1 chr1</i>   | Others_DR    | 9.40              | 1.78              | 29.31         |
| <i>Thermotoga maritima</i>               | Others_TM    | 39.83             | 1.03              | 168.7         |
| <i>Brucella melitensis 16m chr1</i>      | Proteo_BM    | 4.86              | 1.19              | 15.96         |
| <i>Escherichia coli k12</i>              | Proteo_EC    | 6.21              | 0.90              | 37.93         |
| <i>Haemophilus influenzae rd kw20</i>    | Proteo_HI    | 2.21              | 0.38              | 12.20         |
| <i>Helicobacter pylori j99</i>           | Proteo_HP    | 2.30              | 0.47              | 10.76         |
| <i>Neisseria meningitidis mc58</i>       | Proteo_NM    | 4.71              | 0.79              | 19.60         |
| <i>Pseudomonas aeruginosa pa01</i>       | Proteo_PAe   | 10.37             | 1.66              | 51.24         |
| <i>Rickettsia prowazekii madrid e</i>    | Proteo_RPM   | 0.75              | 0.11              | 5.33          |
| <i>Sinorhizobium meliloti 1021</i>       | Proteo_SM    | 13.39             | 1.43              | 59.8          |
| <i>Shewanella oneidensis mr1</i>         | Proteo_SO    | 3.73              | 0.60              | 28.45         |
| <i>Salmonella typhimurium lt2</i>        | Proteo_ST    | 8.01              | 0.90              | 50.79         |
| <i>Vibrio cholerae n16961 chr1</i>       | Proteo_VC    | 2.75              | 0.69              | 12.88         |
| <i>Xanthomonas campestris atcc 33913</i> | Proteo_XC    | 3.74              | 1.66              | 10.95         |
| <i>Yersinia pestis</i>                   | Proteo_YP    | 3.35              | 0.67              | 22.33         |
| <i>Borrelia burgdorferi b31</i>          | Spiro_BB     | 5.76              | 0.16              | 40.00         |
| <i>Treponema pallidum nichols</i>        | Spiro_TPN    | 12.96             | 1.43              | 30.34         |

**Table 7.1** Percentage of genes encoding proteins associated with the optimal Shine-Dalgarno sequence GGAGG - comparison between the Z-scores observed for 32genomes. The Z-scores are computed from the percentages observed on the bacterial genomes ( $p_{bact}$ ) and the mean ( $p_{rand}$ ) and standard deviation calculated from similarly-AT rich genomes generated at random.

If an organism like *B. subtilis* exhibits such a high frequency of putative strong promoters, one would then expect to encounter a higher concentration of mRNAs in these cells as compared to *E. coli*. Facing a similar question in view of the high densities of putative *functional* promoters identified in bacterial genomes, Huerta and co-authors suggest that the majority of putative *functional* promoters could simply not proceed further than the formation of the closed complex with RNA polymerase (18). Amongst such sequences, the ones that could be activated through single point mutation are postulated to be sequences inherited from the ancestral genome. Selection would maintain them to circumvent deleterious mutations of the main promoter(s), or to adjust gene expression depending on environmental changes. Secondly, according to these authors, within regulatory regions, some of the numerous promoter-like sequences detected might actually be functional, but only be active under restricted conditions. Though our study does not deal with densities in regulatory regions but frequencies over genomes, it is attractive to transpose such explanations to our case. Some genomes would be favoured by evolution as harbouring more potentially strong promoters than other genomes. However, the conditions under which these cryptic promoters would contribute to high gene expression are unknown. So far, as we will see in a further section, for cost reasons, only few experimentations relative to putative strong promoters identified by BACTRANS<sup>2</sup> have been performed.
