# Supplementary material for: Large-scale computational and statistical analyses of high transcription potentialities in 32 prokaryotic genomes
Source: PubMed Central journal article supplement — Nucleic Acids Res. 2008 Apr 25;36(10):3332–40. doi: 10.1093/nar/gkn135 (PMC2425493; doi:10.1093/nar/gkn135), 2008-04-25
Supplement: gkn135_10.pdf [file gkn135_10.pdf]

## Appendix 8.

### Putative strong promoters *versus* experimentally verified promoters in *Escherichia coli* genome

| <i>CI</i>                        |                                    |            |            |                              |                              |                  |               |               |               |               |
|----------------------------------|------------------------------------|------------|------------|------------------------------|------------------------------|------------------|---------------|---------------|---------------|---------------|
| gene                             | functional promoter identifier (*) | score (**) | strand     | BACTRANS <sup>2</sup><br>TSS | RegulonDB<br>TSS             | $\Delta_{BR}$    | PromEC<br>TSS | $\Delta_{BP}$ | $\Delta_{RP}$ |               |
| infC                             | P2                                 | 1.0        | reverse    | 1898842                      | 1898842                      | <b>0</b>         | see RegulonDB | see RegulonDB | 0             |               |
| ahpC                             |                                    | 1.0        | forward    | 638105                       | 638144                       | 39               | see RegulonDB | see RegulonDB | 0             |               |
| manX                             |                                    | 1.0        | forward    | 1899938                      | 1899957                      | <b>19</b>        | see RegulonDB | see RegulonDB | 0             |               |
| ansB                             | P2                                 | 1.4        | reverse    | 3098822                      | 3098773                      | 49               | 3098770       | 52            | 3             |               |
| phnC                             |                                    | 1.4        | reverse    | 4322774                      | 4323229                      | 455              | 4322784       | <b>10</b>     | 445           |               |
| gltB                             |                                    | 1.4        | forward    | 3352071                      | 3352531                      | 460              | 3352144       | 73            | 387           |               |
| argI                             |                                    | 1.4        | reverse    | 4475921                      | 4476367                      | 446              | 4475907       | <b>14</b>     | 460           |               |
| frdA                             |                                    | 6.4        | reverse    | 4379994                      | 4380435                      | 441              | 4379990       | <b>4</b>      | 445           |               |
| carA                             | P1                                 | 1.4        | forward    | 29502                        | 29551                        | 49               | -             | -             | -             |               |
| flgB                             |                                    | 11.4       | forward    | 1130088                      | 1130216                      | 128              | -             | -             | -             |               |
| clpB                             |                                    | 0.6        | reverse    | 2732222                      | -                            | -                | 2732225       | <b>3</b>      | -             |               |
| pfkB                             |                                    | 1.4        | forward    | 1804299                      | -                            | -                | 1804376       | 77            | -             |               |
| <i>CII</i>                       |                                    |            |            |                              |                              |                  |               |               |               |               |
| gene                             | functional promoter identifier (*) | (***)      | score (**) | strand                       | BACTRANS <sup>2</sup><br>TSS | RegulonDB<br>TSS | $\Delta_{BR}$ | PromEC<br>TSS | $\Delta_{BP}$ | $\Delta_{RP}$ |
| infC                             | P2                                 | x          |            |                              |                              |                  | <b>0</b>      |               |               |               |
| ahpC                             |                                    | x          |            |                              |                              |                  | <b>39</b>     |               |               |               |
| manX                             |                                    | x          |            |                              |                              |                  | <b>19</b>     |               |               |               |
| argI                             |                                    | x          |            |                              |                              |                  | 446           |               | <b>14</b>     |               |
| ansB                             | P2                                 | x          |            |                              |                              |                  | 49            |               | 52            |               |
| phnC                             |                                    | x          |            |                              |                              |                  | 455           |               | <b>10</b>     |               |
| gltB                             |                                    | x          |            |                              |                              |                  | 460           |               | 73            |               |
| clpA                             | P1                                 |            | 1.6        | forward                      | 922302                       | 922303           | <b>1</b>      | see RegulonDB | see RegulonDB | 0             |
| oxyR                             |                                    |            | 1.6        | forward                      | 4156036                      | 4156480          | 444           | 4156036       | <b>0</b>      | 444           |
| otsB                             |                                    |            | 1.8        | reverse                      | 1980464                      | 1980489          | <b>25</b>     | see RegulonDB | see RegulonDB | 0             |
| acnA                             | P1                                 |            | 1.8        | forward                      | 1333810                      | 1333448          | 362           | see RegulonDB | see RegulonDB | 0             |
|                                  | P2                                 |            | "          | "                            | "                            | 1333805          | <b>5</b>      | see RegulonDB | see RegulonDB | 0             |
| frdA                             |                                    | d          | 1.8        | reverse                      | 4379980                      | 4380435          | 455           | 4379990       | <b>10</b>     | 445           |
| carA                             | P1                                 | x          |            |                              |                              |                  | 49            | -             | -             | -             |
| rhaS                             |                                    |            | 1.6        | forward                      | 4095229                      | 4095734          | 963           | -             | -             | -             |
| cpxR                             |                                    |            | 1.6        | reverse                      | 4103443                      | 4103709          | 266           | -             | -             | -             |
| flgB                             |                                    | d          | 1.8        | forward                      | 1130088                      | 1130216          | 128           | -             | -             | -             |
| mgtA                             | P1                                 |            | 2.0        | forward                      | 4465137                      | 4465386          | 249           | -             | -             | -             |
|                                  | P2                                 |            | "          | "                            | "                            | 4465303          | 166           | -             | -             | -             |
| zntA                             |                                    |            | 2.0        | forward                      | 3604017                      | 3604445          | 428           | -             | -             | -             |
| clpB                             |                                    | x          |            |                              |                              |                  | -             | -             | <b>3</b>      | -             |
| pfkB                             |                                    | x          |            |                              |                              |                  | -             | -             | 77            | -             |
| <i>CII</i> , UP element required |                                    |            |            |                              |                              |                  |               |               |               |               |
| gene                             | functional promoter identifier (*) | (***)      | score (**) | strand                       | BACTRANS <sup>2</sup><br>TSS | RegulonDB<br>TSS | $\Delta_{BR}$ | PromEC<br>TSS | $\Delta_{BP}$ | $\Delta_{RP}$ |
| carA                             | P1                                 |            | 15.4       | forward                      | 29552                        | 29551            | <b>1</b>      | -             | -             | -             |
| pfkB                             |                                    |            | 6.0        | forward                      | 1804332                      | -                | -             | 1804376       | 44            | -             |

**Table 8.1** Comparison of the transcription start sites (TSSs) relative to putative strong  $\sigma 70$  promoters identified by BACTRANS<sup>2</sup> in *E. coli* genome, with respect to the TSS(s) of the functional  $\sigma 70$  promoter(s) harboured in the same gene. The functional promoters of *E. coli* are annotated in RegulonDB and PromEC databases. (\*) when several functional promoters are known, they are denoted *P1*, *P2* and so on; (\*\*) BACTRANS<sup>2</sup> score (see Subsection "Scoring function used"); (\*\*\*) x indicates whether the putative strong promoters identified under *CI* and *CII* constraints are identical; d indicates a difference between them;  $\Delta_{BR}$ : bp distance between BACTRANS<sup>2</sup> TSS and RegulonDB TSS;  $\Delta_{BP}$ : bp distance between BACTRANS<sup>2</sup> TSS and PromEC TSS;  $\Delta_{RP}$ : bp distance between RegulonDB TSS and PromEC TSS; - indicates that the gene is not referred to in the corresponding database; low bp distances ( $\leq 25$ ) are highlighted in boldface characters.

Regarding *CI* constraints, 12 out of the 96 genes harbouring potentially strong  $\sigma 70$  promoters are present in RegulonDB or PromEC databases. Gene *infC* is the only one having the TSS relative to the putative promoter exactly coinciding with a functional promoter referred to in RegulonDB or PromEC. Besides, we note that genes *infC*, *ahpC* and *manX* each have identical TSSs for the functional promoter in RegulonDB and the functional promoter in PromEC database. On the contrary, *ansB*, *phnC*, *gltB*, *frdA* and *argI* RegulonDB TSSs differ from those reported in PromEC database. Two genes (*carA*, *flgB*) are referred to in RegulonDB only. Two genes (*clpB*, *pfkB*) are only mentioned in PromEC database. For some genes, the TSSs relative to the putative

strong promoter and the functional promoter are close (0 (*infC*), 3 (*clpB*), 4 (*frdA*)) or relatively close (10 (*phnC*), 14 (*argI*), 19 (*manX*)). All three remaining genes show a bp distance between the putative strong promoter and the functional promoter over 39: 39 (*ahpC*), 49 (*ansBP2*), 49 (*carAP1*), *gltBB* (73), *pfkB* (77), *flgB* (128).

When constraints are relaxed (*CII*), 20 out of the 254 genes identified with putative strong promoters are present in RegulonDB or PromEC databases. Among the 12 genes already identified under *CI* constraints and mentioned in at least one of the RegulonDB or PromEC databases, we check that the BACTRANS<sup>2</sup> score is improved for genes *flgB* and *frdA*. Again, *infC* is the single gene whose functional promoter mentioned in RegulonDB or PromEC is also an intrinsically strong promoter. Eight more genes identified by our software are encountered in both repositories. Three of them have the TSS of their putative strong promoter in the close vicinity of a functional TSS (*oxyR* (0), *clpA* (1), *acnAP2* (5)), or at a rather small bp distance (*otsB* (25)). On the other hand, the bp distances between the putative strong promoter and the functional promoter identified for genes *rhaS*, *cpxR*, *mgtA* and *zntA* are all over 100.

To recapitulate, under *CI* condition, coincidence between the putative strong promoter's TSS and the functional promoter's is verified for one gene, close proximity ( $\leq 5$  bp) is verified for two genes, relative proximity ( $\leq 25$  bp) is reported for three genes. Under *CII* condition, coincidence is observed for two genes; close proximities are reported for four genes, as well as relative proximity. We note that Regulon DB alone contributes for 6 genes not referred to in PromEC. PromEC alone contributes for 3 genes. Moreover, when a gene is referred to by both databases, the two functional promoters' TSSs may be located at remote positions. Comparing the distances between putative strong promoters and their nearest functional promoters, we observe that 6 distances out of 12 are below 25, under *CI* conditions. Ten distances out of 20 are below 25 under *CII* conditions, including a superposition of the TSSs in two cases.

Finally, under the most stringent constraint (*CI*, UP element required), none of the 3 genes identified by BACTRANS<sup>2</sup> is referred to in the two repositories devoted to functional promoters. In contrast, under the more relaxed similarity constraint *CII*, we identify two genes, *carA* and *pfkB*, also mentioned in RegulonD or PromEC. The bp distance between the putative strong promoter's TSS and the functional promoter's is rather high for *pfkB* (44). However, this distance is outstandingly small (1), for gene *carAP1*.

We now discuss the reasons likely to explain the results observed. New  $\sigma 70$  models were recently compiled from 684 functional promoters listed in RegulonDB and PromEC databases (Shultzaberger *et al.*, 2007) under the form of sequence logos, corresponding to Position-Specific Scoring Matrices. One such model is provided for each possible length of the gap located between -35 and -10 boxes (in range [15-20]) (see latter reference, Figure 2). Such models are consistent with our specification of the  $\sigma 70$  strong promoter in terms of bp distance constraints. Nonetheless, the specificities of these models are rather low. The sequence logos of the -35 boxes indicate that the two first nucleotides of the consensus TTGAC are more likely to be encountered simultaneously in the functional promoters than any other pair of nucleotides in the consensus; this description is compatible with constraint *CII* but not with constraint *CI*. However, in view of the sequence logos relative to the -10 box, it is looking unlikely that more than 3 nucleotides are simultaneously conserved with respect to consensus TATAAT; the least drastic condition, *CII*, requires that no more than 2 nucleotides differ with respect to the -10 consensus. Hence, we did constrain our strong  $\sigma 70$  promoter model in a way consistent with biological reality, that is with -35 box less specific than -10 box; anyway, we constrained it a degree higher with regard to known functional promoters, which is the least expected for intrinsically strong promoters.
